# Supplementary material
Source: publisher figshare collection journal article supplement (https://karger.figshare.com/ndownloader/files/29645049)
Supplement: Supplementary file 1 [file 29645049]

# Supplementary information

Supplementary Fig. 1. Study flow diagram and different analysis datasets according to persistence on liraglutide.


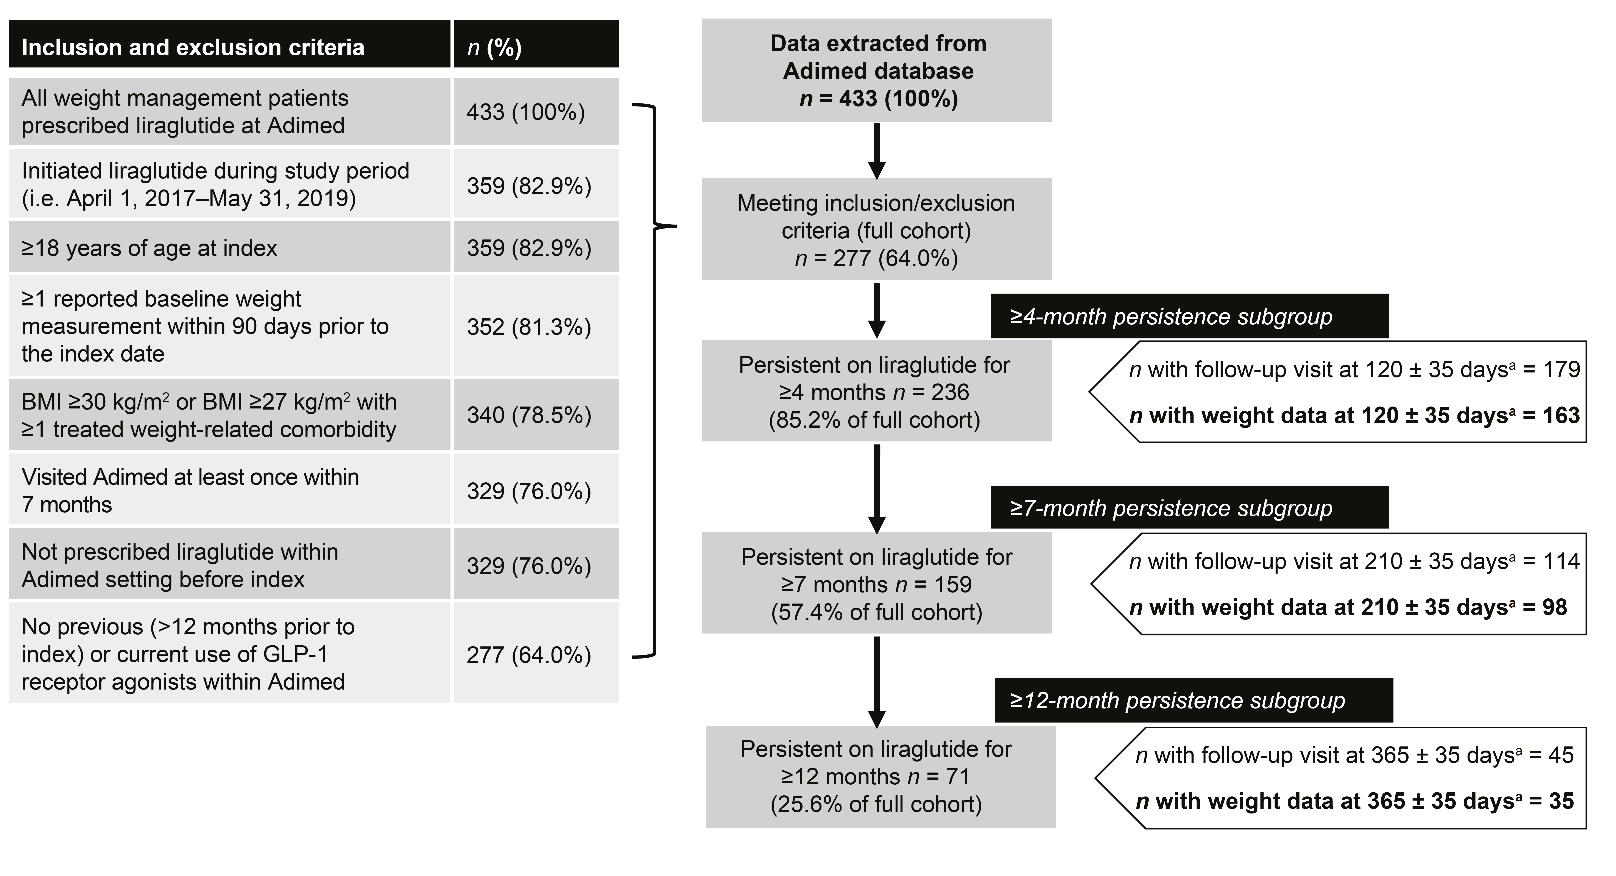


aAfter start of liraglutide treatment (index date).

GLP-1, glucagon-like peptide-1.
